# Supplementary material for: Footprints of parasitism in the genome of the parasitic flowering plant Cuscuta campestris
Source: Springer Nature journal article supplement (doi:10.1038/s41467-018-04344-z), 2018-06-22
Supplement: MOESM1 [file 41467_2018_4344_MOESM1_ESM.pdf › 41467_2018_4344_MOESM1_ESM.pdf]

## **SUPPLEMENTARY INFORMATION**

### **Footprints of parasitism in the genome of the parasitic flowering plant**

*Cuscuta campestris*

Vogel et al.

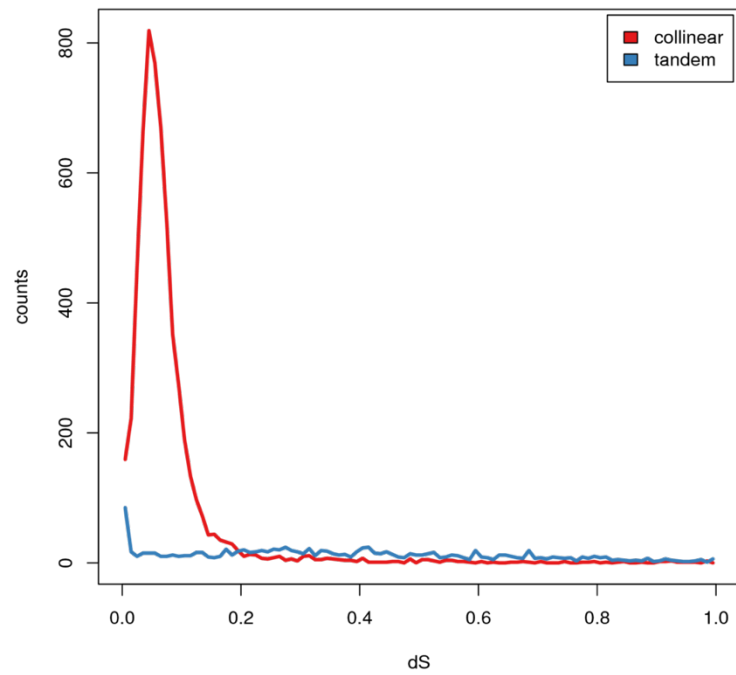

**Supplementary Fig. 1** Paralog ds rate analysis. Synonymous substitution rate (dS) analysis; density of dS rates of *C. campestris* paralogs classified as collinear (syntenic) or tandem by MCScanX. Only simple pairs (exactly two genes) were counted for simplicity.

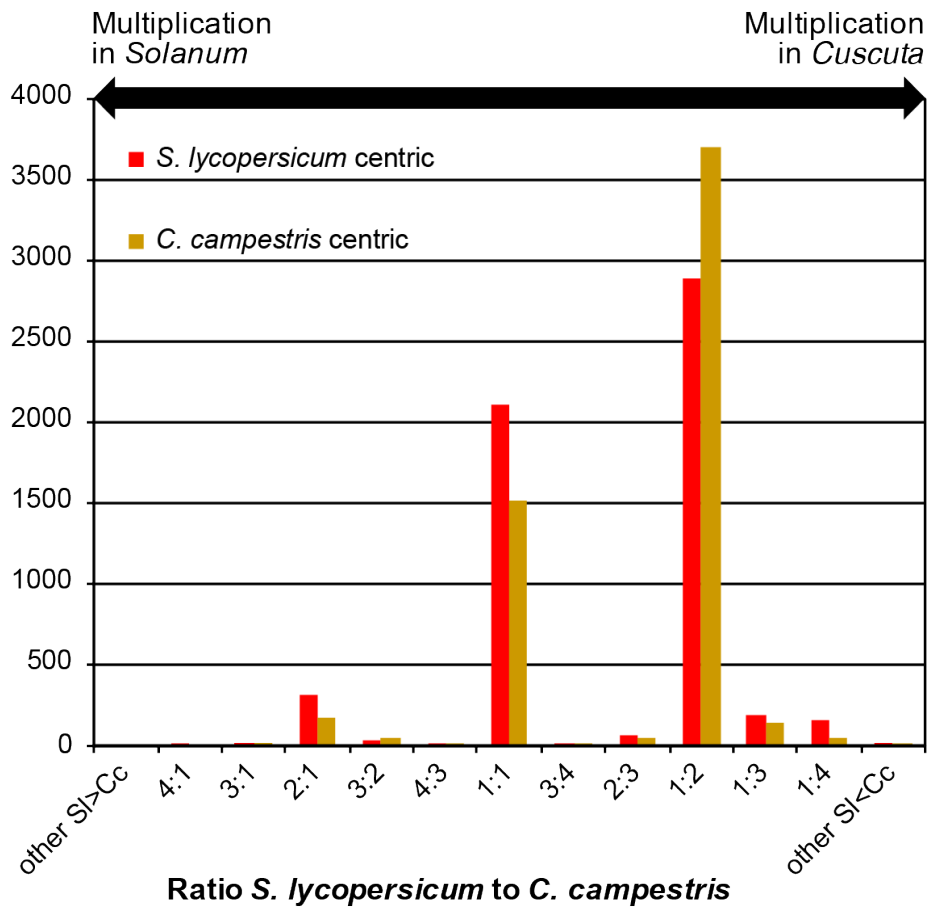

**Supplementary Fig. 2** Homolog analysis in syntenic blocks between *S. lycopersicum* and *C. campestris*. Ratio of homologs occurring in syntenic blocks between *S. lycopersicum* and *C. campestris*. Number of syntenic homologous gene groups when quantified from MCScanX output alignment that is *C. campestris* centric (gold) or *S. lycopersicum* centric (red).

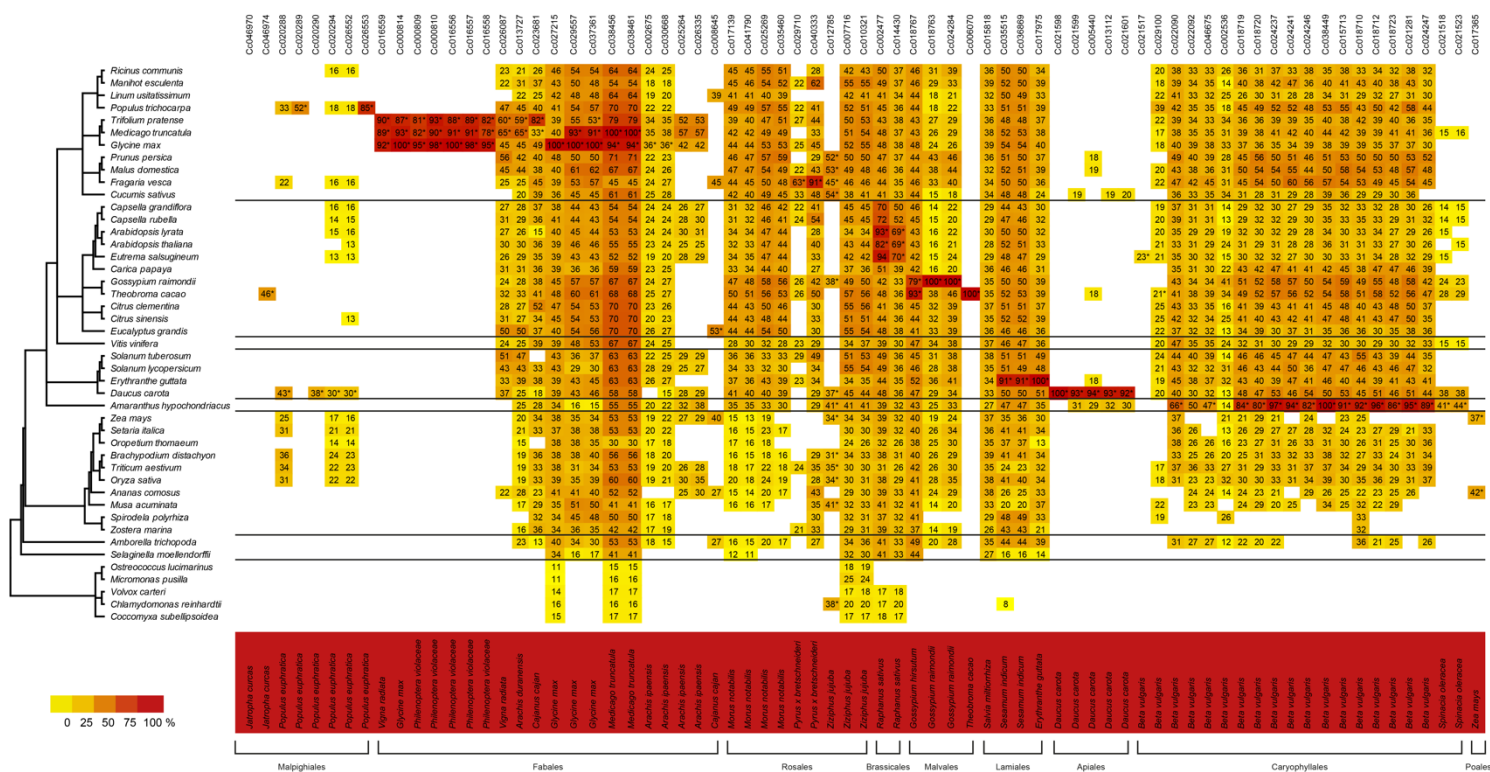

**Supplementary Fig. 3** Sequence similarity of HGT candidates in *C. campestris* with orthologs from species with sequenced genomes. Amino acid sequences of HGT candidates (shown on top) compared against the genomes of 45 species from the plant kingdom (left) using BLASTp. The heat map shows the bit scores in each species as a percentage of the best-hit bit score from a BLASTp-search using the NCBI nr database (shown in Extended Data Table 3). The species with the best hit that represents the 100% reference value is shown at the bottom in red. A linear colour scale from yellow (0%) to red (100%) was used as visual aid in the table. Asterisks in the columns highlight potential HGT donors or their available ancestors as suggested by a Notung 2.9 based analysis.

a. Top percent = 0.001

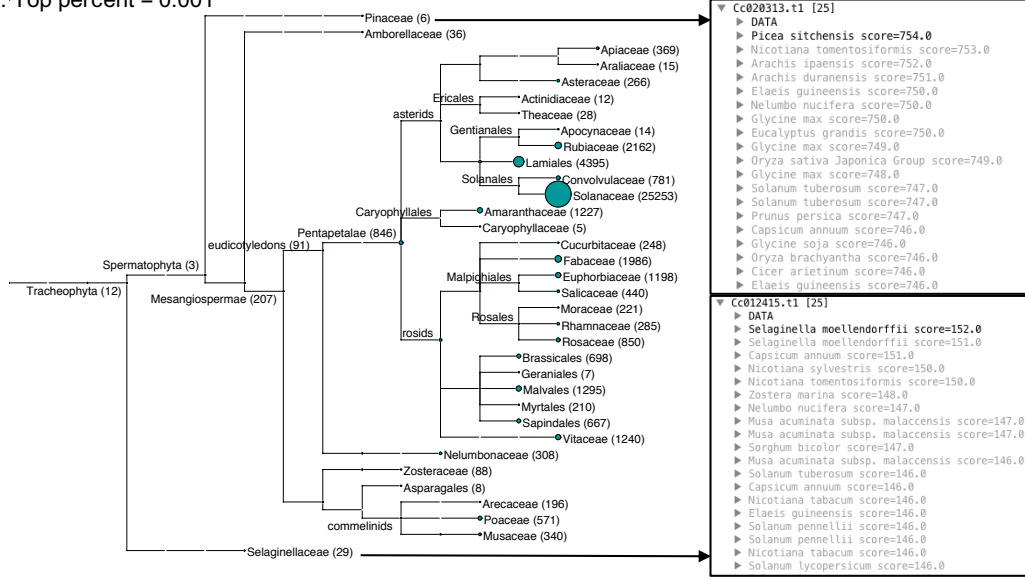

b. Top percent = 40

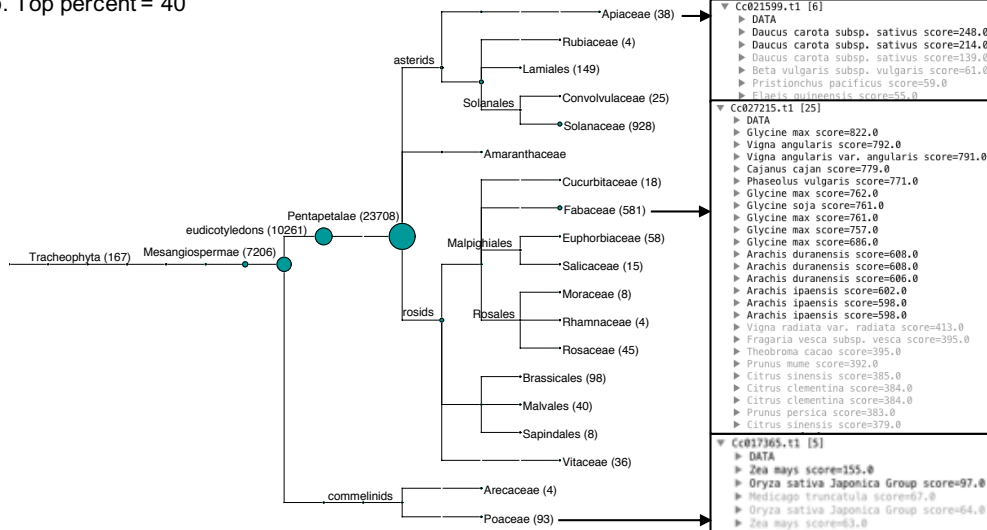

**Supplementary Fig. 4** Taxonomic profiling of (a) best hits and (b) extended best hit lists obtained by BLASTP-comparison of *C. campestris* amino acid sequences to the non-redundant protein database (nr) from NCBI using MEGAN6<sup>1</sup>. Taxon resolution was set to families. Circles at the nodes correspond in size to the number of hits obtained for the respective taxon (shown in brackets). The absolute best hit bitscore cutoff was 50. **a** A relative cutoff of 0.001% of best hit bitscore allows for a best-hit-only evaluation independent of how conserved a sequence is across different taxa. **b** A relative cutoff of 40% of best hit bitscore places conserved sequences into higher phylogenetic ranks (phylum or class), while faster-evolving or taxon-specific sequences are assigned to lower phylogenetic ranks (e.g. family or genus). Framed boxes on the right show screen shots of the hit inspection window, where hits that count towards the taxon rank assignment are shown in black and hits that were not considered according to the cutoff settings are shown in grey (only best hit for (a) and all hits within 40% of top hit for (b)).



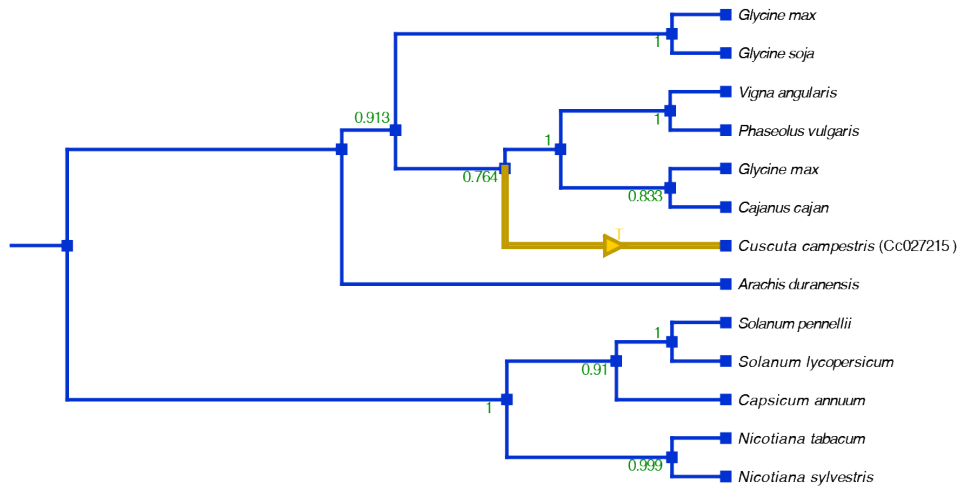

**Supplementary Fig. 6** Prediction of gene donors for the HGT candidate gene shown in Fig. 5b. The yellow arrow indicates the predicted direction of the transfer. Numbers at the nodes are edge weight values determined by Notung<sup>3</sup> based on local support values estimated by Fasttree<sup>4</sup>.

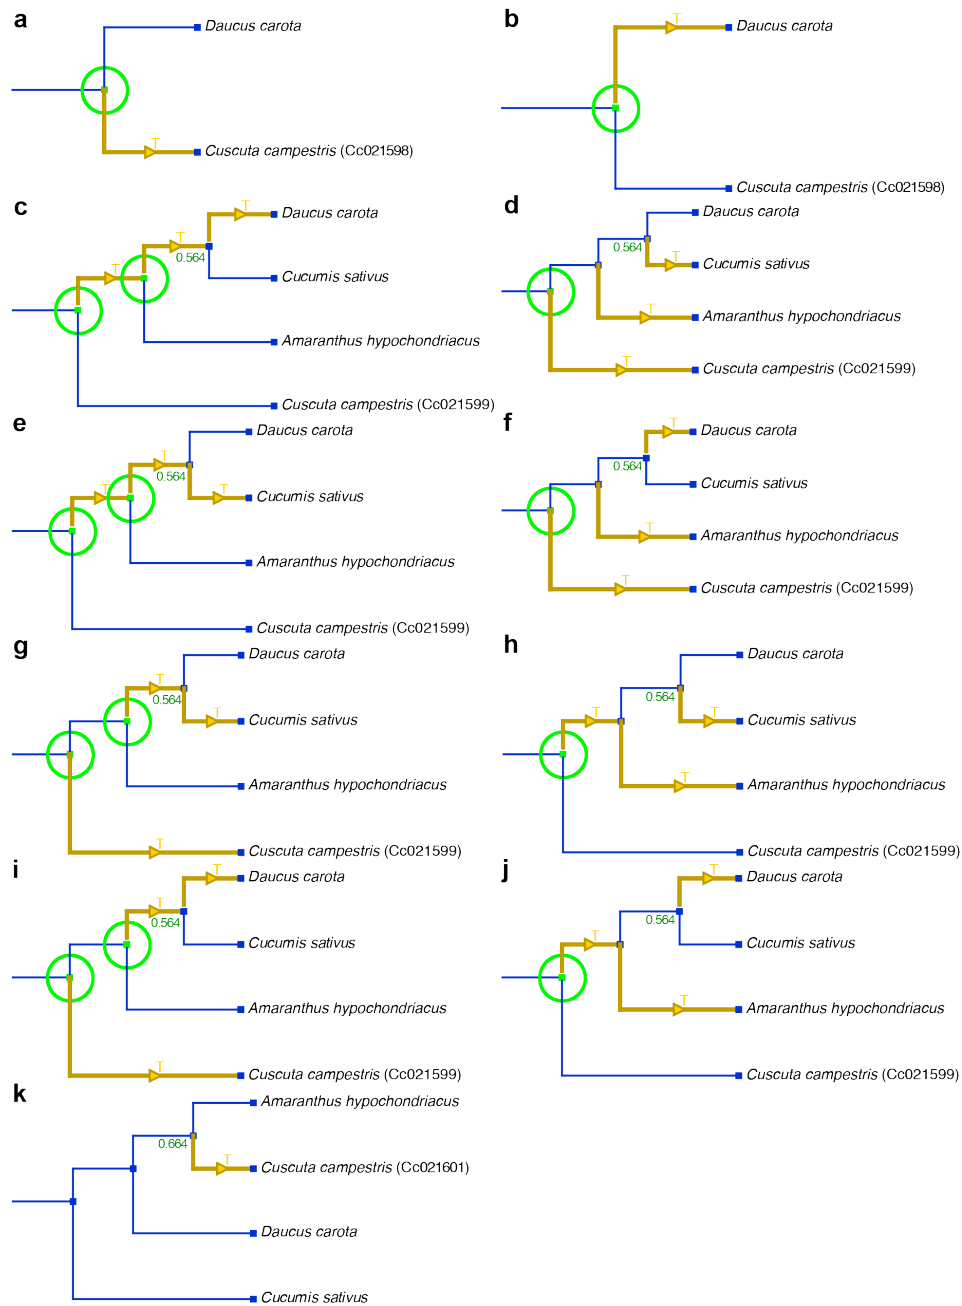

**Supplementary Fig. 7** Alternative HGT event solutions predicted by Notung 2.9 for three genes located on the putatively transferred DNA fragment shown in Fig. 5c. **a**, **b** Two solutions offered for *Cc021598*. **d - j** Eight solutions offered for *Cc021599*. **k** One solution offered for *Cc021601*. Yellow arrows indicate predicted directions of the transfer. Green circles indicate different solutions of the reconciliation of the respective gene tree with the species tree (Supplementary Fig. 5). Numbers at the nodes are edge weight values as determined by Notung<sup>3</sup> based on local support values estimated by Fasttree<sup>4</sup>.



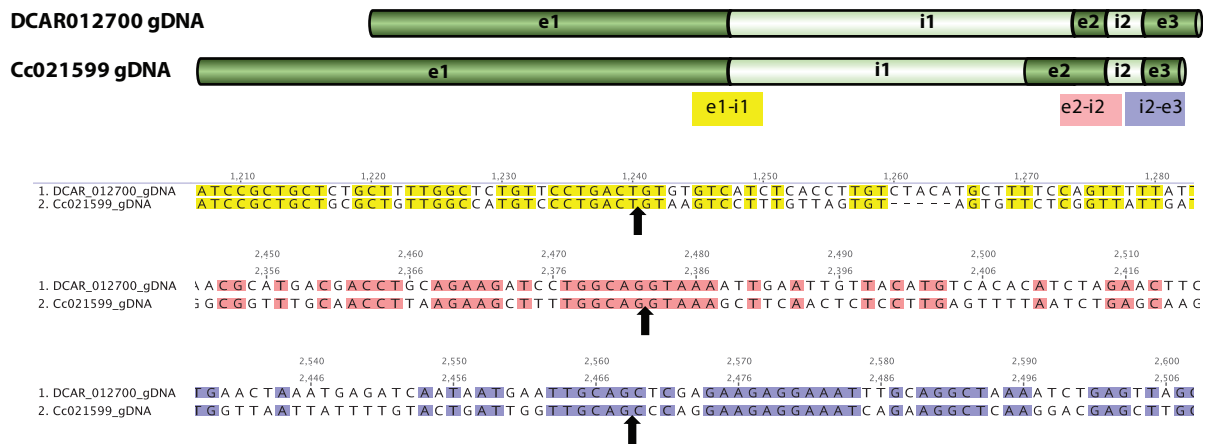

**Supplementary Fig. 8** Conservation of intron positions in HGT candidate *Cc021599* and its closest ortholog from *D. carota*. On top, a schematic overview of the three exons (e1-3, in dark green) and two introns (i1-2, in light green) of both genes are shown. Below, sequences surrounding the conserved borders between exon 1/intron 1 (in yellow), exon 2/intron 2 (in red) and intron 2/exon 3 (in blue) are depicted. Sequence identities between both genes are highlighted in with the respective colors. The exact border between exon and intron (or vice versa) are indicated with arrows.

| <i>Cuscuta campestris</i> | HR-1dpi<br>vs. FS | HR-3dpi<br>vs. FS | Predicted function or domain                    |
|---------------------------|-------------------|-------------------|-------------------------------------------------|
| Cc038461                  | -3.190            | -5.978            | Clan71/CYP76-type cytochrome P450 monooxygenase |
| Cc037361                  |                   | -5.749            | Anthocyanin malonyl-transferase, BAHD-type      |
| Cc038456                  | -2.315            | -4.034            | Clan71/CYP76-type cytochrome P450 monooxygenase |
| Cc000810                  | -1.607            | -1.978            | Albumin                                         |
| Cc013112                  | -0.597            | -1.157            | Uncharacterized protein, Kelch motif            |
| Cc021599                  | -0.758            | -1.139            | Uncharacterized protein, Kelch motif            |
| Cc016557                  |                   | -1.091            | Albumin                                         |
| Cc016558                  |                   | -0.935            | Albumin                                         |
| Cc000809                  |                   | -0.905            | Albumin                                         |
| Cc030668                  |                   | -0.687            | Ankyrin repeat                                  |
| Cc006070                  |                   | -0.599            | Uncharacterized protein                         |
| Cc027215                  | 0.949             |                   | CES101 G-type lectin receptor-like kinase       |
| Cc022090                  | 0.928             | 0.481             | hypothetical or uncharacterized protein         |
| Cc020289                  | 0.499             | 0.623             | hypothetical or uncharacterized protein         |
| Cc017139                  |                   | 0.655             | F-box protein                                   |
| Cc035460                  |                   | 0.687             | F-box protein                                   |
| Cc024237                  |                   | 0.696             | F-box protein CPR30-like                        |
| Cc021517                  | 0.526             | 0.716             | Uncharacterized protein                         |
| Cc046675                  | 0.530             | 0.819             | F-box/Kelch repeat                              |
| Cc025264                  | 0.854             | 0.923             | Replication factor-A CTD-like                   |
| Cc015713                  | 0.728             | 0.991             | F-box protein CPR30-like                        |
| Cc020290                  | 0.714             | 1.122             | hypothetical or uncharacterized protein         |
| Cc007716                  | 3.710             | 1.156             | Receptor kinase                                 |
| Cc026553                  | 1.138             | 1.410             | hypothetical or uncharacterized protein         |
| Cc021601                  | 0.875             | 1.438             | Uncharacterized protein. Kelch motif            |
| Cc029710                  | 1.379             | 1.495             | Zinc finger BED domain containing protein       |
| Cc010321                  | 3.879             | 1.616             | Receptor kinase                                 |
| Cc026552                  | 1.337             | 1.683             | hypothetical or uncharacterized protein         |
| Cc017975                  | 1.724             | 2.127             | Late blight resistance protein homolog RIA-3    |
| Cc023681                  | 2.183             | 2.213             | FAR1-related seq. 5                             |
| Cc020294                  | 2.006             | 2.245             | hypothetical or uncharacterized protein         |
| Cc015818                  |                   | 5.200             | lectin-like receptor kinase SMLII               |
| Cc018720                  | 4.446             | 6.827             | F-box protein CPR30-like                        |
| Cc035515                  | 7.523             | 7.133             | Xyloglucan-specific endoglucanase inhibitor     |
| Cc036869                  | 5.832             | 7.369             | Xyloglucan-specific endoglucanase inhibitor     |

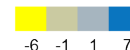

**Supplementary Fig. 9** HGT candidates showing differential expression during haustorial induction. Fold-changes ( $\log_2$ ) in gene expression are shown for stems where haustoria were induced by far-red light (HR)<sup>5</sup>, 1 or 3 days post induction (dpi) in comparison to non-infectious feeding stems (FS). The FDR cut-off was set to  $<0.05$  (Supplementary Data File 2). A linear color scale from yellow (-6) to blue (7) was used as visual aid in the heatmap.

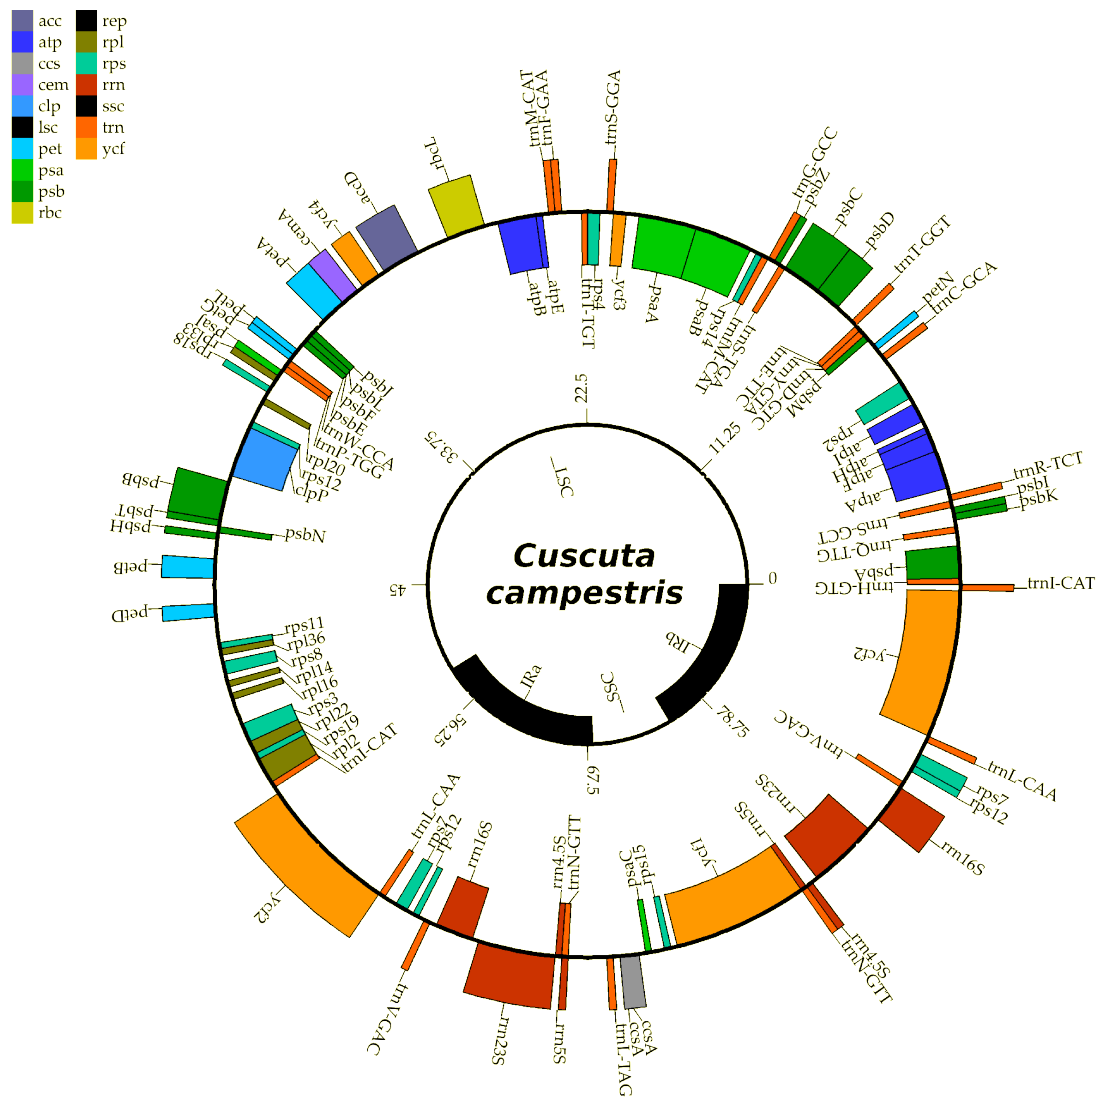

**Supplementary Fig. 10** Circular map of the plastid genome. The map was drawn with CpGAVAS<sup>6</sup> using the plastid genome assembly described in Online Methods. Genes on the outside of the outer ring are transcribed counter-clockwise, genes on the inside clockwise. Positions of the inverted repeats and the large and small single copy regions are indicated on the inner ring. Colors decode different functional groups of genes.

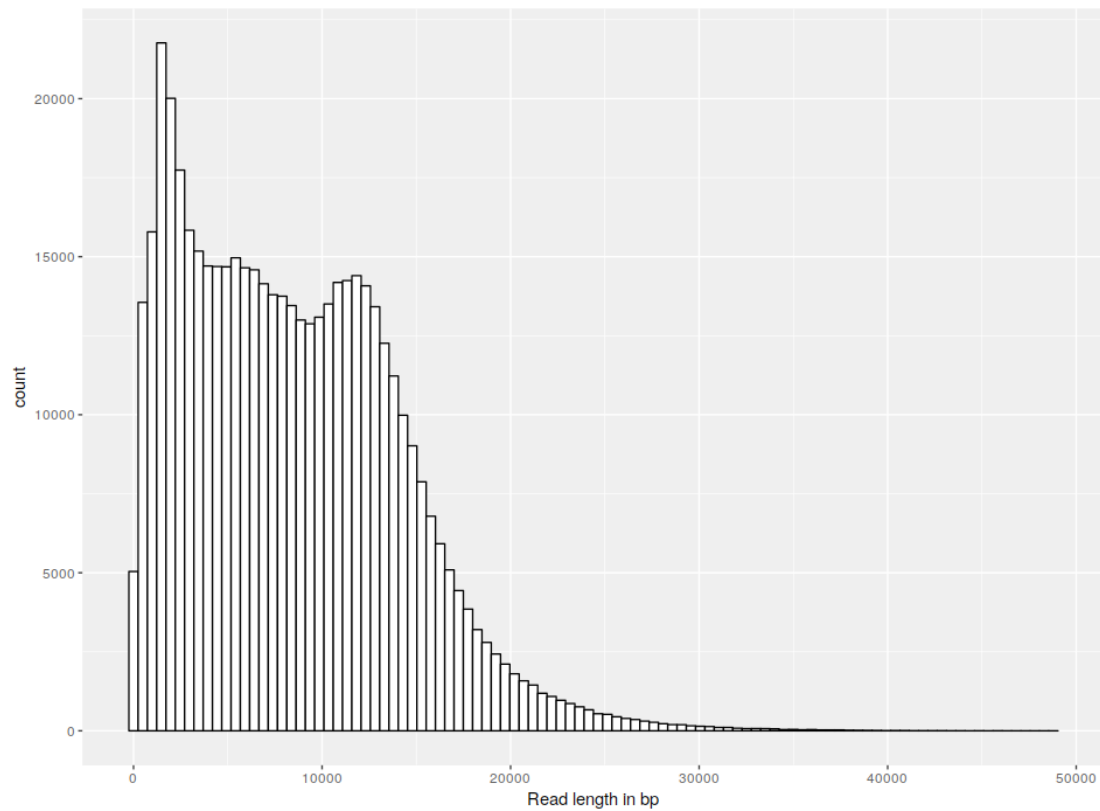

**Supplementary Fig. 11** Sub-read length distribution for *C. campestris* PacBio data. Read length distribution for all 493,246 PacBio sub-reads comprising 4.16 Gbp of sequence data with a maximal observed read length of 48.8 kb. The data represents approximately 8.3-fold genomic coverage.

**Supplementary Table 1 Genome statistics for *C. campestris*.**

| Stage                      | Contigs /Scaffolds | Total size (bp) | N's        | Longest scaffold (bp) | Shortest scaffold (bp) | N75 (bp) | N50 (bp)  | N25 (bp)  |
|----------------------------|--------------------|-----------------|------------|-----------------------|------------------------|----------|-----------|-----------|
| <b>Contigs</b>             | 591,173            | 1,064,390,962   | 0          | 173,761               | 200                    | 5,001    | 16,161    | 31,215    |
| <b>Paired-end</b>          | 254,705            | 524,962,404     | 5438       | 347,423               | 200                    | 7,082    | 27,909    | 58,521    |
| <b>4 kb Mate-Pair</b>      | 231,798            | 536,634,835     | 12,775,187 | 948,39                | 200                    | 32,773   | 99,108    | 203,758   |
| <b>8 kb Mate-Pair</b>      | 227,459            | 544,966,668     | 21,133,051 | 3,066,895             | 200                    | 75,963   | 228,62    | 492,831   |
| <b>&gt;12 kb Mate-pair</b> | 225,883            | 548,038,478     | 24,219,260 | 3,436,115             | 200                    | 140,036  | 433,539   | 910,46    |
| <b>40 kb Fosmids</b>       | 10,151             | 487,105,279     | 29,346,872 | 5,325,031             | 1,001                  | 527,628  | 1,098,382 | 2,273,996 |
| <b>PacBio Scaffolding</b>  | 6,768              | 476,654,732     | 33,100,169 | 5,338,161             | 1,001                  | 638,838  | 1,461,197 | 2,877,936 |
| <b>Gap Filling</b>         | 6,768              | 476,963,533     | 26,220,512 | 5,342,339             | 1,001                  | 639,229  | 1,462,163 | 2,880,294 |
| <b>Assembly validation</b> | 6,907              | 476,794,675     | 26,064,366 | 5,342,339             | 1,001                  | 577,005  | 1,384,808 | 2,799,340 |
| <b>Final</b>               | 6,907              | 476,794,675     | 26,064,366 | 5,342,339             | 1,001                  | 577,005  | 1,384,808 | 2,799,340 |

Statistics of the genome assembly at various stages are given, where the individual stages are given in the first column.

**Supplementary Table 2 Gene content completeness assessment.**

|                    | <i>S. lycopersicum</i> | <i>S. tuberosum</i> | <i>I. nil</i> | <i>I. trifida</i> | <i>C. campestris</i> |
|--------------------|------------------------|---------------------|---------------|-------------------|----------------------|
| <b>Complete</b>    | 1387 (96.3 %)          | 1395 (96.8 %)       | 1349 (93.7 %) | 1325 (92.1 %)     | 1182 (82.1 %)        |
| <b>Single-Copy</b> | 1362 (94.6 %)          | 1357 (94.2 %)       | 1244 (86.4 %) | 1242 (86.3 %)     | 333 (23.1 %)         |
| <b>Duplicated</b>  | 25 (1.7 %)             | 38 (2.6 %)          | 105 (7.3 %)   | 83 (5.8 %)        | 849 (59.0 %)         |
| <b>Fragmented</b>  | 12 (0.8 %)             | 11 (0.8 %)          | 27 (1.9 %)    | 43 (3.0 %)        | 25 (1.7 %)           |
| <b>Missing</b>     | 41 (2.9 %)             | 34 (2.4 %)          | 64 (4.4 %)    | 82 (4.9 %)        | 233 (16.2%)          |
| <b>Total</b>       | 1440                   | 1440                | 1440          | 1440              | 1440                 |

To assess the gene content the *C. campestris* genome and related genomes were analyzed using BUSCO<sup>7</sup>.

**Supplementary Table 3 Repetitive elements in *C. campestris*.**

|                                  | % of<br>genome | % of TE<br>base pairs | number  | MB    |
|----------------------------------|----------------|-----------------------|---------|-------|
| Mobile Element (TXX)             | 46.2           | 100                   | 689,133 | 220.5 |
| Class I: Retroelement (RXX)      | 44.9           | 97.1                  | 673,098 | 214.1 |
| LTR Retrotransposon (RLX)        | 44.5           | 96.4                  | 669,593 | 212.5 |
| Ty1/ <i>copia</i> (RLC)          | 15.8           | 34.1                  | 201,670 | 75.3  |
| full-length RLC                  | 0.4            | 0.9                   | 242     | 1.9   |
| Ty3/ <i>gypsy</i> (RLG)          | 7.8            | 16.9                  | 103,144 | 37.2  |
| full-length RLG                  | 0.4            | 0.8                   | 204     | 1.8   |
| unclassified LTR (RLX)           | 21.0           | 45.3                  | 364,779 | 100.0 |
| full-length RLX                  | 0.6            | 1.2                   | 248     | 2.7   |
| non-LTR Retrotransposon (RXX)    | 0.3            | 0.8                   | 3,505   | 1.7   |
| Class II: DNA Transposon (DXX)   | 1.3            | 2.7                   | 12,576  | 6.1   |
| DNA Transposon Superfamily (DTX) | 1.2            | 2.5                   | 7,163   | 5.6   |
| MITE (DXX)                       | 0.1            | 0.2                   | 5,413   | 0.5   |
| Unclassified Element (TXX)       | 0.1            | 0.1                   | 3,459   | 0.3   |
| <i>Retro-TE/DNA-TE ratio</i>     | <i>35.4</i>    |                       |         |       |
| <i>Copia/Gypsy ratio</i>         | <i>2.0</i>     |                       |         |       |

Detection method: vmatch versus REdat\_9.8\_Eudicot. Transposons were identified by homology to a customized Eudicot transposon library, which had been complemented with de novo detected *C. campestris* full length LTR-retrotransposons (details in the method section). Additional estimates for *C. campestris* specific non-LTR and DNA transposons missing in the transposon library are based on the occurrence of typical Pfam domains for these transposon types.

**Supplementary Table 4: Horizontal gene transfer candidates.**

| Cuscuta protein |             | Best hit in NCBI nr database |                |                        | Taxon containing all hits within relative cutoff (40 % of best hit) |                      | Predicted function or domain                    | MapMan category      |
|-----------------|-------------|------------------------------|----------------|------------------------|---------------------------------------------------------------------|----------------------|-------------------------------------------------|----------------------|
| #               | amino acids | Bit-score                    | NCBI Acc. #    | Species                | Taxon                                                               | Order                |                                                 |                      |
| Cc046970        | 361         | 117                          | KDP34176.1     | Jatropha curcas        | Jatropha                                                            | Malpighiales         | hypothetical or uncharacterized protein         | unknown              |
| Cc046974        | 421         | 103                          |                |                        |                                                                     |                      |                                                 |                      |
| Cc020288        | 158         | 208                          | XP_011001738.1 | Populus euphratica     | Populus                                                             |                      |                                                 |                      |
| Cc020289        | 334         | 213                          |                |                        |                                                                     |                      |                                                 |                      |
| Cc020290        | 182         | 187                          |                |                        |                                                                     |                      |                                                 |                      |
| Cc020294        | 436         | 375                          |                |                        |                                                                     |                      |                                                 |                      |
| Cc026552        | 448         | 379                          |                |                        |                                                                     |                      |                                                 |                      |
| Cc026553        | 322         | 120                          | XP_011001756.1 |                        |                                                                     |                      |                                                 |                      |
| Cc016559        | 114         | 140                          | XP_014524583.1 | Vigna radiata          | Fabaceae                                                            | Fabales              | Albumin*                                        | Defence              |
| Cc000814        | 109         | 124                          | KRH20687.1     | Glycine max            | Faboidae                                                            |                      | Albumin*                                        | Defence              |
| Cc000809        | 126         | 129                          | CAH05245.1     | Philenoptera violaceae |                                                                     |                      | Albumin*                                        | Defence              |
| Cc000810        | 111         | 121                          |                |                        |                                                                     |                      |                                                 |                      |
| Cc016556        | 126         | 130                          |                |                        |                                                                     |                      |                                                 |                      |
| Cc016557        | 130         | 129                          |                |                        |                                                                     |                      |                                                 |                      |
| Cc016558        | 128         | 134                          |                |                        |                                                                     |                      |                                                 |                      |
| Cc026087        | 354         | 219                          | XP_014519530.1 | Vigna radiata          |                                                                     |                      | F-box protein                                   | unknown              |
| Cc013727        | 481         | 352                          | XP_015941539.1 | Arachis duranensis     |                                                                     |                      | F-box protein                                   | unknown              |
| Cc023681        | 542         | 359                          | KYP33191.1     | Cajanus cajan          |                                                                     |                      | FAR1-related seq. 5                             | Development          |
| Cc027215        | 797         | 1024                         | XP_006597152.1 | Glycine max            |                                                                     |                      | CES101 G-type lectin receptor-like kinase       | Defence              |
| Cc029557        | 496         | 526                          | XP_003540336.1 | Glycine max            |                                                                     |                      | Anthocyanin malonyl-transferase, BAHD-type      | Secondary metabolism |
| Cc037361        | 431         | 440                          |                |                        |                                                                     |                      |                                                 |                      |
| Cc038456        | 496         | 695                          | XP_013469345.1 | Medicago truncatula    |                                                                     |                      | Clan71/CYP76-type cytochrome P450 monooxygenase | unknown              |
| Cc038461        | 496         | 695                          |                |                        |                                                                     |                      |                                                 |                      |
| Cc002675        | 215         | 325                          | XP_016181845.1 | Arachis ipaensis       | Arachis                                                             |                      | Ankyrin repeat                                  | unknown              |
| Cc030668        | 213         | 305                          |                |                        |                                                                     |                      |                                                 |                      |
| Cc025264        | 225         | 207                          | XP_015965546.1 | Arachis duranensis     | Arachis                                                             |                      | Replication factor-A CTD-like                   | unknown              |
| Cc026335        | 273         | 187                          |                |                        |                                                                     |                      |                                                 |                      |
| Cc008645        | 277         | 171                          | KYP69131       | Cajanus cajan          | Cajanus                                                             | Hypothetical protein | unknown                                         |                      |
| Cc017139        | 400         | 434                          | XP_010091000.1 | Morus notabilis        | Morus                                                               | Rosales              | F-box protein                                   | unknown              |
| Cc025269        | 393         | 408                          |                |                        |                                                                     |                      |                                                 |                      |
| Cc035460        | 288         | 305                          |                |                        |                                                                     |                      |                                                 |                      |
| Cc041790        | 401         | 430                          |                |                        |                                                                     |                      |                                                 |                      |
| Cc007716        | 479         | 543                          | XP_015900204.1 | Ziziphus jujuba        | Rosales                                                             |                      | Receptor kinase                                 | unknown              |
| Cc010321        | 471         | 528                          |                |                        |                                                                     |                      |                                                 |                      |
| Cc012785        | 225         | 285                          | XP_015901651.1 | Ziziphus jujuba        | Ziziphus                                                            |                      | 23 kDa jasmonate-induced protein-like           | unknown              |
| Cc029710        | 309         | 214                          | XP_009364679.1 | Pyrus x bretschneideri | Pyrus                                                               |                      | Zinc finger BED domain containing protein       | Transcription        |
| Cc040333        | 861         | 204                          |                |                        |                                                                     |                      |                                                 |                      |
| Cc002477        | 329         | 586                          | XP_018466532.1 | Raphanus sativus       | Brassicaceae                                                        | Brasicales           | Strictosidine synthase-like 1*                  | Secondary metabolism |
| Cc014430        | 346         | 646                          |                |                        |                                                                     |                      |                                                 |                      |
| Cc018763        | 484         | 472                          | XP_012488091.1 | Gossypium raimondii    | Gossypium                                                           | Malvales             | F-box protein                                   | unknown              |
| Cc024284        | 379         | 355                          |                |                        |                                                                     |                      |                                                 |                      |
| Cc018767        | 768         | 412                          | XP_016729221.1 | Gossypium hirsutum     | Malvaceae                                                           |                      | Subtilisin-like endopeptidase                   | unknown              |
| Cc006070        | 414         | 152                          | XP_017985368.1 | Theobroma cacao        | Theobroma                                                           |                      | Uncharacterized protein                         | unknown              |

continued on next page



continued from previous page

| Cuscuta protein |             | Best hit in NCBI nr |                |                            | Taxonomic unit containing all hits within 40 % relative cutoff |                | Predicted function or domain                 | MapMan category |
|-----------------|-------------|---------------------|----------------|----------------------------|----------------------------------------------------------------|----------------|----------------------------------------------|-----------------|
| #               | amino acids | Bit-score           | NCBI Acc. #    | Species                    | Taxon                                                          | Order          |                                              |                 |
| Cc015818        | 252         | 330                 | ABU87404.1     | <i>Salvia miltiorrhiza</i> | Lamiales                                                       | Lamiales       | lectin-like receptor kinase SMLII            | Defence         |
| Cc035515        | 436         | 631                 | XP_011099700.1 | <i>Sesamum indicum</i>     |                                                                |                | Xyloglucan-specific endoglucanase inhibitor  | Defence         |
| Cc036869        | 692         | 638                 | XP_012829248.1 | <i>Erythranthe guttata</i> |                                                                |                | Late blight resistance protein homolog RIA-3 | Defence         |
| Cc017975        | 637         | 726                 |                |                            |                                                                |                |                                              |                 |
| Cc021598        | 635         | 153                 | KZN03945.1     | <i>Daucus carota</i>       | Daucus                                                         | Apiales        | hypothetical protein                         | unkown          |
| Cc021599        | 482         | 267                 | KZN03944.1     | <i>Daucus carota</i>       |                                                                |                | Uncharacterized protein, Kelch motif         | unknown         |
| Cc005440        | 536         | 283                 |                |                            |                                                                |                |                                              |                 |
| Cc013112        | 482         | 260                 |                |                            |                                                                |                |                                              |                 |
| Cc021601        | 468         | 258                 |                |                            |                                                                |                |                                              |                 |
| Cc021517        | 287         | 206                 | XP_010689633.1 | <i>Beta vulgaris</i>       | Beta                                                           | Caryophyllales | Uncharacterized protein                      | unknown         |
| Cc029100        | 308         | 298                 | XP_010676933.1 | <i>Beta vulgaris</i>       |                                                                |                | Uncharacterized protein                      | unknown         |
| Cc022090        | 460         | 184                 | XP_010682948.1 | <i>Beta vulgaris</i>       |                                                                |                | F-Box/Kelch repeat                           | Defence         |
| Cc022092        | 446         | 228                 |                |                            |                                                                |                |                                              |                 |
| Cc046675        | 447         | 221                 | KMT04016       | <i>Beta vulgaris</i>       | Amaranthaceae                                                  |                | Hypothetical protein                         | unknown         |
| Cc002536        | 435         | 569                 | XP_010674821.1 | <i>Beta vulgaris</i>       |                                                                |                | F-box protein CPR30-like                     | Defence         |
| Cc018719        | 536         | 239                 |                |                            |                                                                |                |                                              |                 |
| Cc018720        | 348         | 237                 |                |                            |                                                                |                |                                              |                 |
| Cc024237        | 364         | 236                 |                |                            |                                                                |                |                                              |                 |
| Cc024241        | 347         | 224                 |                |                            |                                                                |                |                                              |                 |
| Cc024246        | 365         | 229                 |                |                            |                                                                |                |                                              |                 |
| Cc038449        | 364         | 203                 | XP_010672220.1 | <i>Beta vulgaris</i>       |                                                                |                | F-box protein CPR30-like                     | Defence         |
| Cc015713        | 355         | 220                 |                |                            |                                                                |                |                                              |                 |
| Cc018710        | 544         | 236                 |                |                            |                                                                |                |                                              |                 |
| Cc018712        | 364         | 236                 |                |                            |                                                                |                |                                              |                 |
| Cc018723        | 375         | 219                 |                |                            |                                                                |                |                                              |                 |
| Cc021281        | 355         | 220                 |                |                            |                                                                |                |                                              |                 |
| Cc024247        | 406         | 183                 | KNA19093.1     | <i>Spinacia oleracea</i>   | Spinacia                                                       |                | Hypothetical protein                         | unknown         |
| Cc021518        | 347         | 341                 |                |                            |                                                                |                |                                              |                 |
| Cc021523        | 345         | 326                 |                |                            |                                                                |                |                                              |                 |
| Cc017365        | 208         | 155                 | ACN30700.1     | <i>Zea mays</i>            | Poaceae                                                        | Poales         | Uncharacterized protein                      | unknown         |

\* Proteins for which HGT occurrence in *Cuscuta* has been reported previously are highlighted in grey and referenced at the end.

**Supplementary Table 5. Full names and bin category descriptions for lost genes shown in Figure 4a.**

| Gene name         | Protein description                                 | Category (MapMan bin)              |
|-------------------|-----------------------------------------------------|------------------------------------|
| <i>SGAT</i>       | Serine-glyoxylate transaminase                      | amino acid metabolism              |
| <i>COG0212</i>    | 5,10-methenyl-THF synthetase                        | C1-metabolism                      |
| <i>MENG</i>       | 2-phytyl-1,4-naphthoquinone methyltransferase       | Co-factor and vitamine metabolism  |
| <i>NSP2</i>       | NSP2 component of nodulation initiation complex     | development                        |
| <i>SAG101</i>     | SAG101 regulator of plant immunity                  | development                        |
| <i>PPDK</i>       | Pyruvate pyrophosphate dikinase                     | gluconeogenesis / glyoxylate cycle |
| <i>ALDH</i>       | NADP-dependent GAP dehydrogenase                    | glycolysis                         |
| <i>SOT</i>        | Brassinosteroid sulfotransferase                    | hormone metabolism                 |
| <i>DES-1-like</i> | Delta-4 sphingolipid desaturase                     | lipid metabolism                   |
| <i>CMO-like</i>   | Choline monooxygenase                               | lipid metabolism                   |
| <i>RAM2</i>       | RAM2 mycorrhiza-related G3P acyl transferase        | lipid metabolism                   |
| <i>STS</i>        | Stachyose synthase                                  | minor CHO metabolism               |
| <i>SIP1</i>       | Raffinose synthase                                  | minor CHO metabolism               |
| <i>NSH3</i>       | Nucleosid hydrolase                                 | nucleotide metabolism              |
| <i>HCEF1</i>      | Plastid fructose 1,6 bisphosphatase                 | PS                                 |
| <i>CEPD</i>       | CEPD regulatory peptide of NRT2 nitrate transporter | redox                              |
| <i>RAM1</i>       | RAM1 mycorrhiza-related transcription factor        | RNA                                |
| <i>NIN</i>        | NIN-type transcription factor                       | RNA                                |
| <i>NSP1</i>       | NSP1 component of nodulation initiation complex     | RNA                                |
| <i>ERN1</i>       | Ethylene Response Factor Required for Nodulation1   | RNA                                |
| <i>NFP</i>        | NFR5 nodulation-related receptor kinase             | signalling                         |
| <i>DMI2</i>       | SymRK nodulation-related receptor kinase            | signalling                         |
| <i>DMI3</i>       | CCaMK component of CCaMK-IPD3 kinase                | signalling                         |
| <i>CLH1/COR1</i>  | CLH1 Chlorophyllase                                 | stress                             |
| <i>EDS5</i>       | Plastid salicylic acid transporter                  | stress                             |
| <i>EDS1</i>       | EDS1 regulator of plant immunity                    | stress                             |
| <i>NRT2</i>       | NRT2-type nitrate transporter                       | transport                          |
| <i>NHD</i>        | NHD-type plastid proton/sodium antiporter           | transport                          |
| <i>PHT2</i>       | PHT2 inorganic phosphate transporter                | transport                          |
| <i>HKT1</i>       | HKT1 sodium/potassium transporter                   | transport                          |
| <i>IRT1</i>       | IRT 1 iron transporter                              | transport                          |
| <i>NCS1</i>       | PLUTO nucleobase cation transporter                 | transport                          |
| aa transporter    | HAAAP-type amino acid transporter                   | transport                          |
| <i>TDT</i>        | TDT-type vacuolar di-/tricarboxylate transporter    | transport                          |
| <i>NAR2</i>       | Nar2 nitrate uptake accessory component             | transport                          |
| <i>VAPYRIN</i>    | VAPYRIN ankyrin repeat RF-like protein              | transport                          |
| <i>LRGB</i>       | PLGG plastid glycolate-glycerate transporter        | not assigned                       |
| <i>SGRL</i>       | SGRL-type Mg-dechelataase                           | not assigned                       |
| <i>RP1</i>        | Regulatory kinase of PPDK                           | not assigned                       |
| <i>CLD1</i>       | CLD1 chlorophyll dephytylase                        | not assigned                       |
| <i>IPD3</i>       | IPD3 component of CCaMK-IPD3 kinase                 | not assigned                       |
| <i>CERBERUS</i>   | CERBERUS ubiquitin ligase                           | not assigned                       |

In addition, five Supplementary Data Files contain data that is too large to be displayed on a single page:

**Supplementary Data 1:** Orthogroups comprising genes from *Amaranthus hypochondriacus*, *Arabidopsis thaliana*, *Daucus carota*, *Mimulus guttatus*, *Oryza sativa*, *Sorghum bicolor*, *Solanum lycopersicum*, *Vitis vinifera*, *Populus trichocarpa*, *Dioscorea rotundata* and *Ipomoea nil*.

**Supplementary Data 2:** Expression data of HGT candidates.

**Supplementary Data 3:** Extrinsic information configuration file for AUGUSTUS.

**Supplementary Data 4:** List of species used for gene loss evaluation.

**Supplementary Data 5:** HGT candidate gene trees.

## SUPPLEMENTARY REFERENCES

- 1 Huson, D. H. et al. MEGAN community edition - interactive exploration and analysis of large-scale microbiome sequencing data. *PLoS Comput. Biol.* **12**, e1004957 (2016).
- 2 Mirarab, S. & Warnow, T. ASTRAL-II: coalescent-based species tree estimation with many hundreds of taxa and thousands of genes. *Bioinformatics* **31**, i44-i52 (2015).
- 3 Stolzer, M. et al. Inferring duplications, losses, transfers and incomplete lineage sorting with nonbinary species trees. *Bioinformatics* **28**, i409-i415 (2012).
- 4 Price, M. N., Dehal, P. S. & Arkin, A. P. FastTree 2--approximately maximum-likelihood trees for large alignments. *PLoS One* **5**, e9490 (2010).
- 5 Olsen, S. et al. Getting ready for host invasion: elevated expression and action of xyloglucan endotransglucosylases/hydrolases in developing haustoria of the holoparasitic angiosperm *Cuscuta*. *J. Exp. Bot.* **67**, 695-708 (2016).
- 6 Liu, C. et al. CpGAVAS, an integrated web server for the annotation, visualization, analysis, and GenBank submission of completely sequenced chloroplast genome sequences. *BMC Genomics* **13**, 715 (2012).
- 7 Simao, F. A., Waterhouse, R. M., Ioannidis, P., Kriventseva, E. V. & Zdobnov, E. M. BUSCO: assessing genome assembly and annotation completeness with single-copy orthologs. *Bioinformatics* **31**, 3210-3212 (2015).
- 8 Zhang, Y. et al. Evolution of a horizontally acquired legume gene, albumin 1, in the parasitic plant *Phelipanche aegyptiaca* and related species. *BMC Evol. Biol.* **13**, 48 (2013).
- 9 Zhang, D. et al. Root parasitic plant *Orobancha aegyptiaca* and shoot parasitic plant *Cuscuta australis* obtained Brassicaceae-specific strictosidine synthase-like genes by horizontal gene transfer. *BMC Plant Biol.* **14**, 19 (2014).
